# Supplementary material for: Restriction of Manganese Intake Prevents the Onset of Brain Manganese Overload in Zip14−/− Mice
Source: MDPI journal article supplement (doi:10.3390/ijms22136773), 2021-06-24
Supplement: s1 [file s1]

# Restriction of Manganese Intake Prevents the Onset of Brain Manganese Overload in *Zip14*<sup>-/-</sup> Mice

Yuze Wu, Guojun Wei and Ningning Zhao \*

Department of Nutritional Sciences, The University of Arizona, Tucson, AZ 85721, USA;

yuzewu@email.arizona.edu (Y.W.); gwei@email.arizona.edu (G.W.)

\* Correspondence: zhaonn@email.arizona.edu; Tel.: +1-520-621-9744

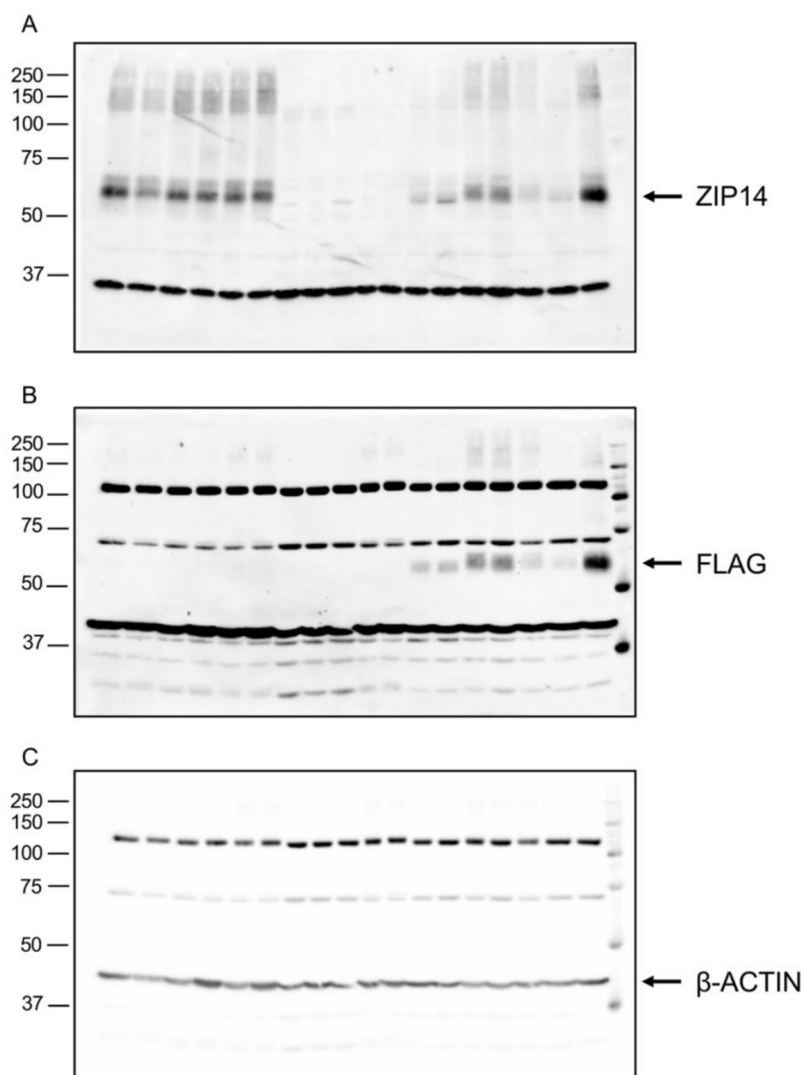

**Figure S1.** Uncropped Western blot images shown in Figure 4A. Uncropped images for (A) ZIP14 blot, (B) FLAG blot, and (C) β-ACTIN blot.
